# Supplementary material
Source: PubMed Central journal article supplement (PMC8346241)
Supplement: mmc1.pdf [file mmc1.pdf]

# THE LANCET

## **Supplementary appendix**

This appendix formed part of the original submission and has been peer reviewed. We post it as supplied by the authors.

Supplement to: Perry RJ, Tamborska A, Singh B, et al. Cerebral venous thrombosis after vaccination against COVID-19 in the UK: a multicentre cohort study. *Lancet* 2021; published online Aug 6. [http://dx.doi.org/10.1016/S0140-6736\(21\)01608-1](http://dx.doi.org/10.1016/S0140-6736(21)01608-1).

# Cerebral venous thrombosis after vaccination against COVID-19 in the UK: a multicentre cohort study

*Perry et al. (2021)*

## Appendix

### List of CAIAC collaborators

Sara Al-izzi, Aravindhan Baheerathan, Soma Banerjee, Gary Benson, Claudia Boshier, Sandeep Buddha, Nathan Burley, Ruaridh Cameron Smail, Arvind Chandratheva, Pavel Chudakou, Philip Clatworthy, Alasdair Coles, Thomas Cox, Ranjit Dasgupta, Richard Davenport, Darrell Devine, Stephen Fenlon, Carolyn Gabriel, Rita Ghatala, Claire Hall, Milan Hargovan, Kirsty Harkness, Ian Harvey, Lucy Hicken, Laura Howaniec, Abubaker Ibnouf, Luis Idrovo, Gordon Ingle, Yong Kyan Lee, Ailidh Lang, Simon McBride, Malcolm McLeod, Ruth Medlock, Puja Mehta, Ian Morrison, Girish Muddegowda, Sharon Muzerengi, Donald Pang, Gopinath Periyasamy, Gavin Preston, Naomi Priestley, Lydia Revicka, Sadia Saber, Elliott Smith, Youssef Sorour, Oliver Spooner, Jon Stone, Laszlo Sztriha, Narmathey Thambirajah, Rhys Thomas, David Veale, Jasmine Wall, Sarah White, James White, Syarah Yusoff and Laura Zambreanu.

### Venous risk factors recorded

Venous risk factors listed in the International Study on Cerebral Vein and Dural Sinus Thrombosis (ISCVT)<sup>12</sup> were designated 'ISCVT risk factors' and analysed separately so that a direct comparison with ISCVT could be made. These were:

- combined oral contraceptive pill or HRT
- pregnancy or recent childbirth
- thyroid disease
- dehydration
- malignancy or myeloproliferative disorder
- recent neurosurgery or head injury
- recent lumbar puncture
- Behçet syndrome or SLE
- antiphospholipid syndrome or other acquired thrombophilia
- inherited thrombophilias
- intracranial infection
- inflammatory bowel disease

However we also present data on a broader collection of known or putative venous risk factors, which in addition to the factors above included:

- obesity
- smoking
- chronic renal disease
- previous DVT or PE
- family history of venous thrombo-embolism

### Staged roll-out of vaccination by age criteria in the UK during 2021

At the time of this study, most vaccination in the United Kingdom was offered according to age criteria, starting with people aged 80 and over, and then progressively working downwards through the other age groups. Up to 12th April 2021 all individuals aged 50 and over were offered vaccination and from 13th April 2021 individuals aged 45 and over were offered vaccination. The vaccine was only routinely offered to patients aged 40-45 years after 30th April 2021, which was the last date of vaccination of any of the individuals included in the present study. A minority of individuals were vaccinated using criteria other than age, such as those with a very high risk from COVID-19 and their carers, frontline health or social care workers, individuals who lived or worked in care homes and individuals with learning difficulties.

## Appendix tables

|                       |            | ELISA     |           |            | Total     |
|-----------------------|------------|-----------|-----------|------------|-----------|
|                       |            | Positive  | Negative  | Not tested |           |
| Acustar HIT-IgG assay | Positive   | 3         | 0         | 0          | 3         |
|                       | Negative   | 9         | 5         | 0          | 14        |
|                       | Not tested | 46        | 11        | 21         | 78        |
|                       | Total      | <b>58</b> | <b>16</b> | <b>21</b>  | <b>95</b> |

ELISA assays were Stago Asserachrom, Immucor Lifecodes or Hyphen Zymutest. Of the 21 patients not tested by either of these methods, two were tested only using a functional assay (Diapharma HITAlert), and 19 patients were not tested for anti-PF4 antibodies by any method.

**Table A1: Contingency table comparing testing for anti-PF4 antibodies using ELISA or Acustar HIT-IgG assay (an automated chemiluminescent assay), the two commonest methods used**

| Patient                                                                 | A                                             | B                   | C               | D                               | E                        | F                                            |
|-------------------------------------------------------------------------|-----------------------------------------------|---------------------|-----------------|---------------------------------|--------------------------|----------------------------------------------|
| Sex                                                                     | Male                                          | Female              | Female          | Female                          | Female                   | Female                                       |
| Age group (decade)                                                      | 50s                                           | 50s                 | 50s             | 60s                             | 50s                      | 50s                                          |
| Vaccine given                                                           | ChAdOx1                                       | ChAdOx1             | ChAdOx1         | ChAdOx1                         | ChAdOx1                  | ChAdOx1                                      |
| Interval (days)                                                         | 17                                            | 14                  | 20              | 8                               | 8                        | 8                                            |
| Symptoms                                                                | Headache, abdominal pain, vomiting, dysphasia | Headache, dysphasia | Headache        | Headache, dysphasia, drowsiness | Headache                 | Headache, left facial weakness, left neglect |
| Admission platelet count (x10 <sup>9</sup> /L) NR 150-400               | 73                                            | 158                 | 110             | 57                              | 37                       | 57                                           |
| Lowest platelet count (x10 <sup>9</sup> /L) NR 150-400                  | 73                                            | 158                 | 110             | 34                              | 24                       | 57                                           |
| Highest platelet count after treatment (x10 <sup>9</sup> /L) NR 150-400 | 259                                           | 355                 | 223             | (768*)                          | 106                      | 374                                          |
| Admission D-dimer (µg/L) NR 220-460                                     | 6,177                                         | 4,985               | 370             | 822                             | 119,913                  | 29,503                                       |
| Highest D-dimer (µg/L) NR 220-460                                       | 22,730                                        | 4,985               | 410             | 822                             | 119,913                  | 29,503                                       |
| Fibrinogen (g/L) NR 1.9-4.3                                             | 2.9                                           | 2.0                 | 2.8             | 2.1                             | 0.83                     | 2.0                                          |
| Anti-PF4 IgG antibody Stago Asserachrom ELISA (OD) NR 0 - 0.238         | 0.827 (+ve)                                   | 0.594 (+ve)         | Not done        | Not done                        | 0.177 (-ve)              | 0.078 (-ve)                                  |
| Anti-PF4 IgG antibody Immucor Lifecodes ELISA (OD) NR 0 - 0.400         | Not done                                      | 1.41 (+ve)          | 2.20 (+ve)      | 0.298 (-ve)                     | Not done                 | Not done                                     |
| Anti-PF4 IgG antibody Hyphen Zymutest ELISA (OD) NR 0 - 0.239           | Not done                                      | Not done            | Not done        | Not done                        | 0.082 (-ve)              | 0.035 (-ve)                                  |
| Brain parenchyma                                                        | Haemorrhagic infarct in left temporal lobe    | Left ICH            | Normal          | Right focal oedema              | Normal                   | Right focal oedema. ICH                      |
| Intracranial sinuses or veins thrombosed                                | Left TS, SS, IJV                              | Left TS, SS         | Right TS, SS.   | Right TS, SS                    | Left CoVT. Left SOV, IOV | Right TS, SS, IJV                            |
| Extracranial thrombosis                                                 | Left PA. HVs, HPV, SV, SMV                    | None                | None            | HVs                             | None                     | None                                         |
| Parenteral anticoagulant                                                | SC fondaparinux                               | None                | SC fondaparinux | SC enoxaparin                   | SC fondaparinux          | IV argatroban                                |
| Oral anticoagulant                                                      | Apixaban                                      | Apixaban            | Warfarin        | Warfarin                        | Dabigatran               | Apixaban                                     |
| Oral steroids                                                           | None                                          | Prednisolone        | Prednisolone    | Prednisolone                    | Prednisolone             | None                                         |
| Plasma exchange                                                         | Yes                                           | No                  | No              | No                              | No                       | No                                           |
| IV immunoglobulin                                                       | Yes                                           | No                  | Yes             | No                              | Yes                      | Yes                                          |
| mRS on discharge                                                        | 3                                             | 2                   | 0               | 2                               | 2                        | 1                                            |
| VITT on Starting Criteria                                               | Yes                                           | No                  | No              | No                              | Yes                      | Yes                                          |

\*Platelet count after platelet transfusion. Precise ages are not given to protect the identities of the patients. ChAdOx1 first dose of ChAdOx1 (AstraZeneca) vaccine. NR normal range, OD optical density, ICH intracerebral haemorrhage, TS transverse sinus, SS sigmoid sinus, IJV internal jugular vein, CoVT cortical vein thrombosis, SOV superior ophthalmic vein, IOV inferior ophthalmic vein, HVs hepatic veins, HPV hepatic portal vein, SV splenic vein, SMV superior mesenteric vein, PA pulmonary artery.

**Table A2: Characteristics of index patients A-F referred to in the text**

|                                       | VITT<br>(n=70) | Non-VITT<br>(n=25) | p value<br>(VITT vs<br>non-VITT) | ISCVT         | p value<br>(VITT vs<br>ISCVT) |
|---------------------------------------|----------------|--------------------|----------------------------------|---------------|-------------------------------|
| Headaches                             | 59 (84%)       | 21 (84%)           | 1.0                              | 553/623 (89%) | 0.27                          |
| Limb weakness                         | 34 (49%)       | 9 (36%)            | 0.28                             | 232/624 (37%) | 0.063                         |
| Nausea / vomiting                     | 31 (44%)       | 6 (24%)            | 0.074                            | Not given     |                               |
| Drowsiness                            | 23 (33%)       | 4 (16%)            | 0.11                             | Not given     |                               |
| Confusion                             | 19 (27%)       | 7 (28%)            | 0.93                             | 137/624 (22%) | 0.32                          |
| Seizures                              | 20 (29%)       | 5 (20%)            | 0.40                             | 245/624 (39%) | 0.081                         |
| Visual field defect                   | 13 (19%)       | 4 (16%)            | 1.0                              | Not given     |                               |
| Language disturbance                  | 12 (17%)       | 7 (28%)            | 0.26                             | 119/624 (19%) | 0.70                          |
| Facial weakness                       | 10 (14%)       | 0                  | 0.06                             | Not given     |                               |
| Limb sensory disturbance              | 10 (14%)       | 4 (16%)            | 1.0                              | Not given     |                               |
| Other cortical                        | 10 (14%)       | 0                  | 1.0                              | Not given     |                               |
| Blurred vision                        | 10 (14%)       | 4 (16%)            | 1.0                              | Not given     |                               |
| Limb clumsiness / ataxia              | 9 (13%)        | 3 (12%)            | 1.0                              | Not given     |                               |
| Papilloedema                          | 7 (10%)        | 1 (4%)             | 0.35                             | 174/614 (28%) | 0.0010                        |
| Diplopia or IIIrd or VIth nerve palsy | 3 (4%)         | 1 (4%)             | 1.0                              | 84/624 (13%)  | 0.028                         |
| Other cranial neuropathy              | 2 (3%)         | 0                  | 1.0                              | Not given     |                               |
| Vertigo                               | 1 (1%)         | 1 (4%)             | 0.46                             | Not given     |                               |

Data compared between VITT-associated cerebral venous thrombosis and the historical cerebral venous thrombosis data set from the ISCVT<sup>12</sup> and between the VITT-associated and non-VITT-associated cerebral venous thrombosis patients in the present study. Variables were compared using the chi squared test.

**Table A3: Clinical features of cerebral venous thrombosis at the time of admission in patients with and without VITT**

|                                                       | VITT<br>(n=70) | Non-VITT<br>(n=25) | p value<br>(VITT vs<br>non-VITT) | ISCVT         | p value<br>(VITT vs<br>ISCVT) |
|-------------------------------------------------------|----------------|--------------------|----------------------------------|---------------|-------------------------------|
| <b>Sinuses / veins occluded</b>                       |                |                    |                                  |               |                               |
| Superior sagittal sinus                               | 43 (61%)       | 12 (48%)           | 0.24                             | 313/624 (50%) | 0.074                         |
| Left transverse sinus                                 | 33 (47%)       | 11 (44%)           | 0.79                             | 279/624 (45%) | 0.70                          |
| Right transverse sinus                                | 31 (44%)       | 9 (36%)            | 0.47                             | 257/624 (41%) | 0.62                          |
| Left sigmoid sinus                                    | 25 (36%)       | 9 (36%)            | 0.98                             | Not given     |                               |
| Right sigmoid sinus                                   | 25 (36%)       | 7 (28%)            | 0.48                             | Not given     |                               |
| Cortical veins                                        | 14 (20%)       | 7 (28%)            | 0.41                             | 107/623 (17%) | 0.55                          |
| Deep venous system                                    | 10 (14%)       | 1 (4%)             | 0.28                             | 68/622 (11%)  | 0.40                          |
| Straight sinus                                        | 11 (16%)       | 1 (4%)             | 0.17                             | 112/623 (18%) | 0.64                          |
| Inferior sagittal sinus                               | 5 (7%)         | 2 (8%)             | 1.0                              | Not given     |                               |
| Cavernous sinus                                       | 3 (4%)         | 0                  | 0.56                             | 8/623 (1%)    | 0.057                         |
| Internal jugular veins                                | 26 (37%)       | 8 (32%)            | 0.65                             | 74/624 (12%)  | <0.0001                       |
| Median number of sinuses<br>or veins thrombosed (IQR) | 3 (2-4)        | 2 (2-3)            | 0.041                            | Not given     |                               |
| <b>Brain parenchyma involvement</b>                   |                |                    |                                  |               |                               |
| Any infarct or haemorrhage                            | 44 (63%)       | 14 (56%)           | 0.55                             | 392/624 (63%) | 1.0                           |
| Any infarcts                                          | 14 (20%)       | 4 (16%)            | 0.66                             | 290/623 (47%) | <0.0001                       |
| Multiple infarcts                                     | 10 (14%)       | 0                  | 0.046                            | Not given     |                               |
| Any haemorrhages                                      | 41 (59%)       | 10 (40%)           | 0.11                             | 245/622 (39%) | 0.0020                        |
| Multiple haemorrhages                                 | 23 (33%)       | 3 (12%)            | 0.045                            | Not given     |                               |
| <b>Extracranial thromboses</b>                        |                |                    |                                  |               |                               |
| Any extracranial thrombosis                           | 31 (44%)       | 1 (4%)             | 0.0003                           |               |                               |
| Pulmonary embolism                                    | 14 (20%)       | 1 (4%)             | 0.11                             |               |                               |
| Hepatic portal vein thrombosis                        | 13 (19%)       | 0                  | 0.018                            |               |                               |
| Deep vein thrombosis in leg                           | 6 (9%)         | 0                  | 0.34                             |               |                               |
| Arterial limb ischaemia                               | 4 (6%)         | 0                  | 0.57                             |               |                               |
| Superior mesenteric vein thrombosis                   | 4 (6%)         | 0                  | 0.57                             |               |                               |
| Myocardial infarction                                 | 2 (3%)         | 0                  | 1.0                              |               |                               |
| Splenic vein thrombosis                               | 2 (3%)         | 0                  | 1.0                              |               |                               |
| Hepatic vein thrombosis                               | 1 (1%)         | 1 (4%)             | 0.46                             |               |                               |
| Arterial ischaemic stroke                             | 2 (3%)         | 0                  | 0.34                             |               |                               |

Data compared between the VITT-associated cerebral venous thrombosis and non-VITT cerebral venous thrombosis in the present study and between VITT-associated cerebral venous thrombosis and the historical cerebral venous thrombosis data set from the ISCVT<sup>12</sup>. Categorical variables were compared using chi squared test (or Fisher's exact test if fewer than 5 patients in any one category); continuous variables were compared using Mann-Whitney U test.

**Table A4: Sites of thrombosis and brain parenchyma involvement in VITT and non-VITT groups**

|                                     | Dead or dependent  | Alive and independent | p value |
|-------------------------------------|--------------------|-----------------------|---------|
| Number of VITT cases                | 33                 | 37                    |         |
| <b>Demographics</b>                 |                    |                       |         |
| Median age (IQR)                    | 52 (34-58)         | 46 (30-51)            | 0.12    |
| Female                              | 19 (58%)           | 20/37 (54%)           | 0.77    |
| Male                                | 14 (42%)           | 17/37 (46%)           |         |
| <b>Clinical assessment</b>          |                    |                       |         |
| History of malignancy               | 2 (6%)             | 0 (0%)                | 0.22    |
| Median admission GCS (IQR)          | 14 (12-15)         | 15 (15-15)            | <0.0001 |
| <b>Blood biomarkers</b>             |                    |                       |         |
| Median platelets (IQR)              | 34 (22-67)         | 50 (34-80)            | 0.078   |
| Median D-dimers (IQR)*              | 12895 (8826-36125) | 16280 (5096-29692)    | 0.17    |
| Median fibrinogen (IQR)             | 1.8 (1.0-2.7)      | 1.7 (1.0-2.5)         | 0.45    |
| Anti-PF4 antibody positive          | 26/26 (100%)       | 32/34 (94%)           | 0.21    |
| <b>Neuroradiological biomarkers</b> |                    |                       |         |
| Cerebral infarction                 | 7 (21%)            | 7 (19%)               | 1.0     |
| Any cerebral haemorrhage            | 27 (82%)           | 14 (38%)              | 0.0002  |
| Multiple cerebral haemorrhages      | 17 (52%)           | 6 (16%)               | 0.0017  |
| Median veins thrombosed (IQR)       | 3 (3-4)            | 3 (2-4)               | 0.19    |
| Thrombosis of deep veins            | 5 (15%)            | 5 (14%)               | 1.0     |

Results are those which were obtained on admission or as close as possible to admission. For categorical variables, the proportion of patients with the characteristic is shown, followed by the percentage in parenthesis. For continuous variables, the median is shown with the interquartile range (IQR) in parenthesis. \*D-dimer result was available in 27 of 33 dead or dependent patients and 35 of 37 alive and independent patients.

**Table A5: Admission characteristics in patients with VITT-associated cerebral venous thrombosis according to whether or not they were dead or dependent (mRS 3-6) at the end of their admission**

|                                     | Died                | Survived           | p value |
|-------------------------------------|---------------------|--------------------|---------|
| Number of VITT cases                | 20                  | 50                 |         |
| <b>Demographics</b>                 |                     |                    |         |
| Median age (IQR)                    | 50 (26)             | 47 (22)            | 1.0     |
| Female                              | 12/20 (60%)         | 27/50 (54%)        | 0.65    |
| Male                                | 8/20 (40%)          | 23/50 (46%)        |         |
| <b>Clinical assessment</b>          |                     |                    |         |
| History of malignancy               | 1/20 (5%)           | 1/50 (2%)          | 0.49    |
| Median admission GCS (IQR)          | 14 (13-15)          | 15 (15-15)         | <0.0001 |
| <b>Blood biomarkers</b>             |                     |                    |         |
| Median lowest platelets (IQR)       | 30 (21-54)          | 51 (33-75)         | 0.034   |
| Median highest D-dimers (IQR)       | 14172 (10000-35000) | 15830 (6050-31301) | 0.16    |
| Median admission fibrinogen (IQR)   | 1.7 (1.1-2.3)       | 1.7 (1.0-2.5)      | 0.46    |
| Anti-PF4 antibody positive          | 14/14 (100%)        | 44/46 (96%)        | 0.43    |
| <b>Neuroradiological biomarkers</b> |                     |                    |         |
| Cerebral infarction                 | 4/20 (20%)          | 10/50 (20%)        | 1.0     |
| Any cerebral haemorrhage            | 15/20 (75%)         | 26/50 (52%)        | 0.078   |
| Multiple cerebral haemorrhages      | 13/20 (65%)         | 10/50 (20%)        | 0.0003  |
| Median veins thrombosed (IQR)       | 3 (1)               | 3 (2)              | 0.20    |
| Thrombosis of deep veins            | 2/20 (10%)          | 8/50 (16%)         | 0.71    |

Results are those which were obtained on admission or as close as possible to admission. For categorical variables, the proportion of patients with the characteristic is shown, followed by the percentage in parenthesis. For continuous variables, the median is shown with the interquartile range (IQR) in parenthesis.

**Table A6: Admission characteristics in patients with VITT-associated cerebral venous thrombosis who died during admission or who survived and were discharged**



|                                      | Numbers of patients treated / not treated | Number of patients that died (%) | p value |
|--------------------------------------|-------------------------------------------|----------------------------------|---------|
| <b>Pharmacological</b>               |                                           |                                  |         |
| Any anticoagulation                  | ..                                        | ..                               | <0.0001 |
| Yes                                  | 60                                        | 11 (18%)                         | ..      |
| No                                   | 10                                        | 9 (90%)                          | ..      |
| Heparin/LMWH                         | ..                                        | ..                               | 0.53    |
| Yes                                  | 16                                        | 3 (19%)                          | ..      |
| No                                   | 54                                        | 17 (31%)                         | ..      |
| Non-heparin parenteral anticoagulant | ..                                        | ..                               | 0.0020  |
| Yes                                  | 50                                        | 9 (18%)                          | ..      |
| No                                   | 20                                        | 11 (55%)                         | ..      |
| Direct oral anticoagulant            | ..                                        | ..                               | 0.0001  |
| Yes                                  | 22                                        | 0 (0%)                           | ..      |
| No                                   | 48                                        | 20 (42%)                         | ..      |
| Corticosteroid                       | ..                                        | ..                               | 0.034   |
| Yes                                  | 51                                        | 11 (22%)                         | ..      |
| No                                   | 19                                        | 9 (47%)                          | ..      |
| Anticonvulsant                       | ..                                        | ..                               | 0.060   |
| Yes                                  | 26                                        | 22 (85%)                         | ..      |
| No                                   | 44                                        | 28 (64%)                         | ..      |
| Fibrinogen replacement               | ..                                        | ..                               | 0.051   |
| Yes                                  | 15                                        | 1 (7%)                           | ..      |
| No                                   | 55                                        | 19 (35%)                         | ..      |
| Intravenous immunoglobulin           | ..                                        | ..                               | 0.080   |
| Yes                                  | 55                                        | 13 (24%)                         | ..      |
| No                                   | 15                                        | 7 (47%)                          | ..      |
| Plasma exchange                      | ..                                        | ..                               | 0.13    |
| Yes                                  | 16                                        | 2 (13%)                          | ..      |
| No                                   | 54                                        | 18 (33%)                         | ..      |
| Platelet transfusion                 | ..                                        | ..                               | 0.0073  |
| Yes                                  | 25                                        | 12 (48%)                         | ..      |
| No                                   | 45                                        | 8 (18%)                          | ..      |
| <b>Invasive</b>                      |                                           |                                  |         |
| Endovascular management              | ..                                        | ..                               | 0.71    |
| Yes                                  | 9                                         | 3 (33%)                          | ..      |
| No                                   | 61                                        | 17 (28%)                         | ..      |
| Intracranial pressure monitor        | ..                                        | ..                               | 0.12    |
| Yes                                  | 13                                        | 6 (46%)                          | ..      |
| No                                   | 57                                        | 14 (25%)                         | ..      |
| Decompressive hemicraniectomy        | ..                                        | ..                               | 0.025   |
| Yes                                  | 13                                        | 7 (54%)                          | ..      |
| No                                   | 57                                        | 13 (23%)                         | ..      |

P values are for chi squared tests comparing the proportion of patients who died during admission, in patients treated compared with those not treated.

**Table A7: Proportions of patients with VITT-associated cerebral venous thrombosis who died during admission, by treatment modality**

Appendix figures

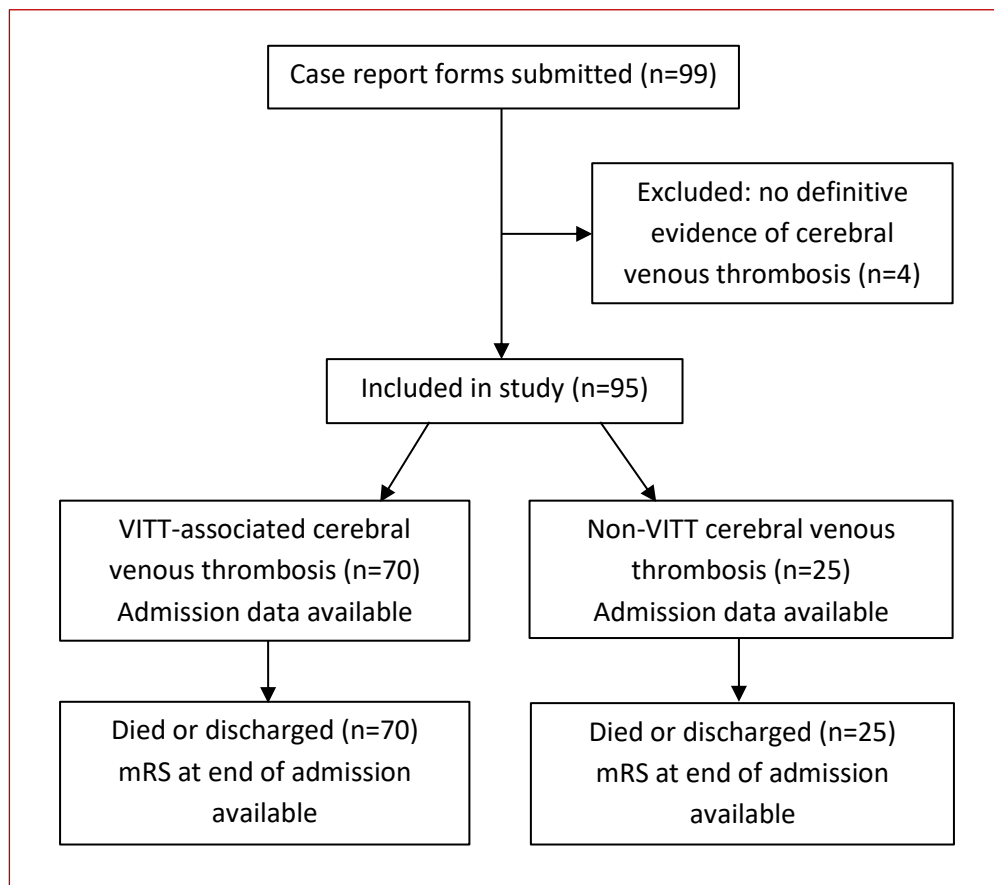

**Figure A1: Study flow diagram.**

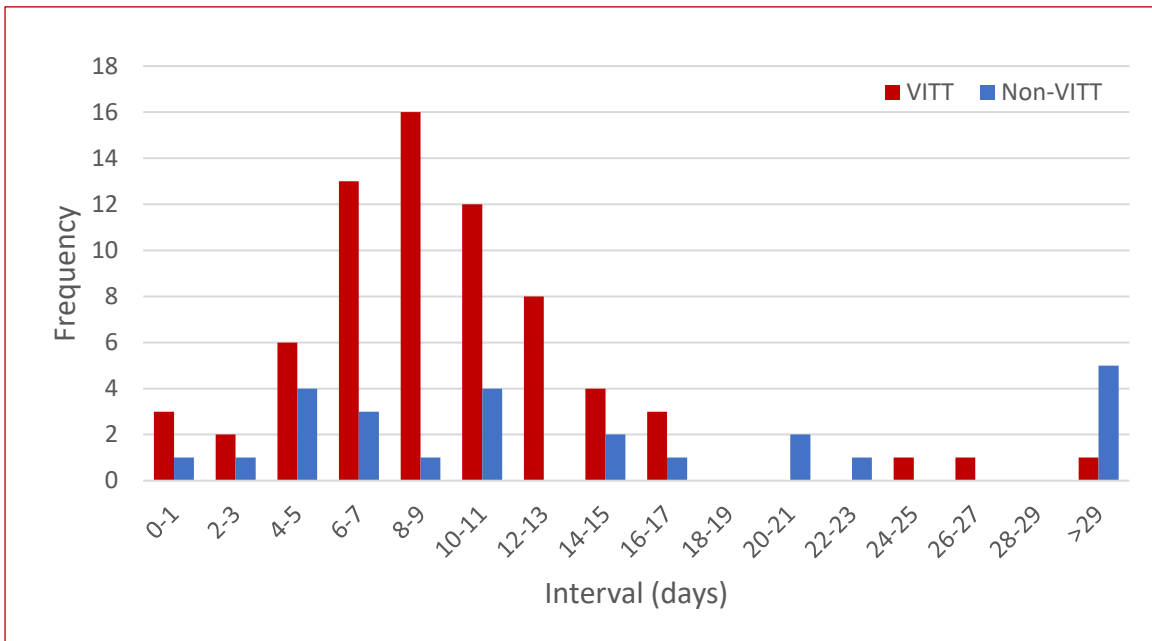

**Figure A2: Interval between vaccine date and onset of symptoms**

Data are shown for all patients with VITT (red bars) or without VITT (blue bars). For patients where a headache developed within hours of vaccination and persisted unchanged up to cerebral venous thrombosis diagnosis, the onset of that headache was recorded as the cerebral venous thrombosis symptom onset, even though at the start it most likely had another mechanism.

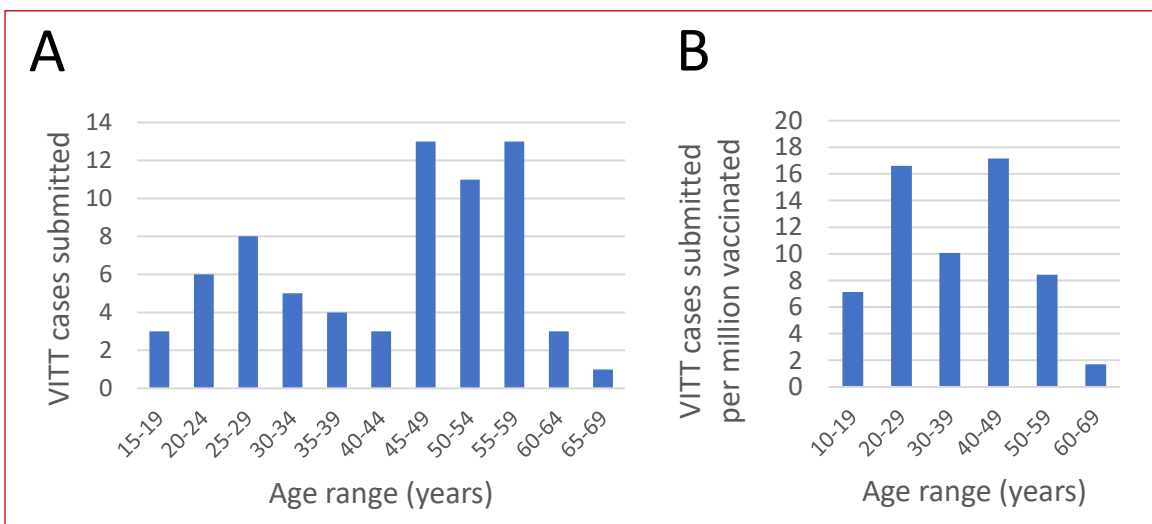

**Figure A3: Age distribution of patients with VITT-associated cerebral venous thrombosis**

A. Raw data. B. Data adjusted for numbers of patients in each age decade vaccinated in the UK extracted from the OpenSafely data set<sup>13</sup>.

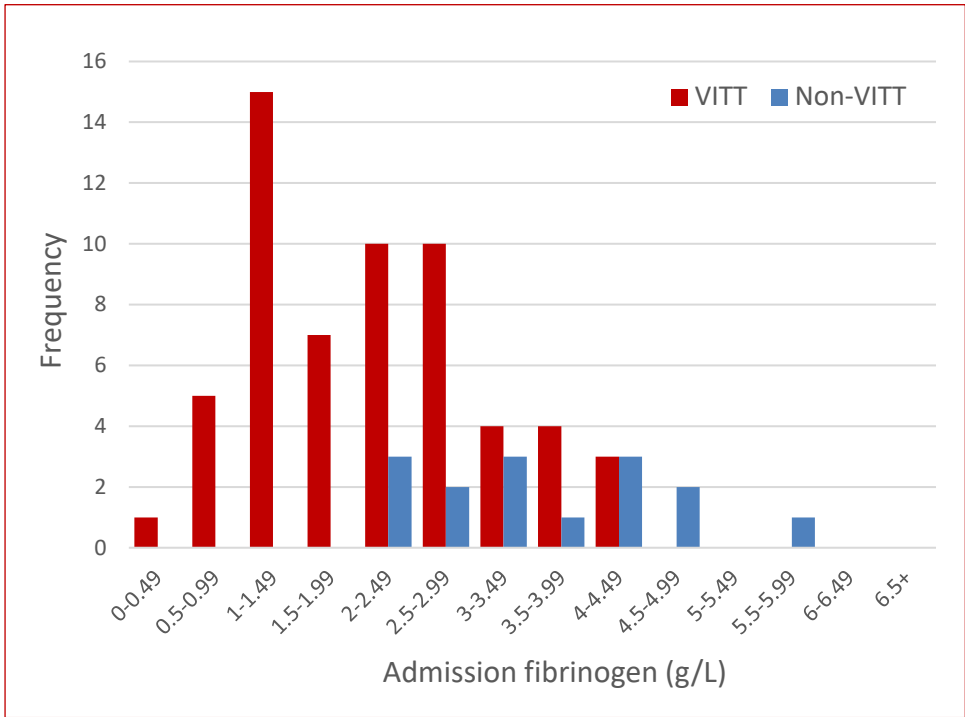

**Figure A4: Distributions of fibrinogen on admission in patients with cerebral venous thrombosis with and without VITT.**

The median fibrinogen was significantly lower in the VITT group (2.0 g/L) than in the non-VITT group (3.3 g/L,  $p=0.0001$ ).

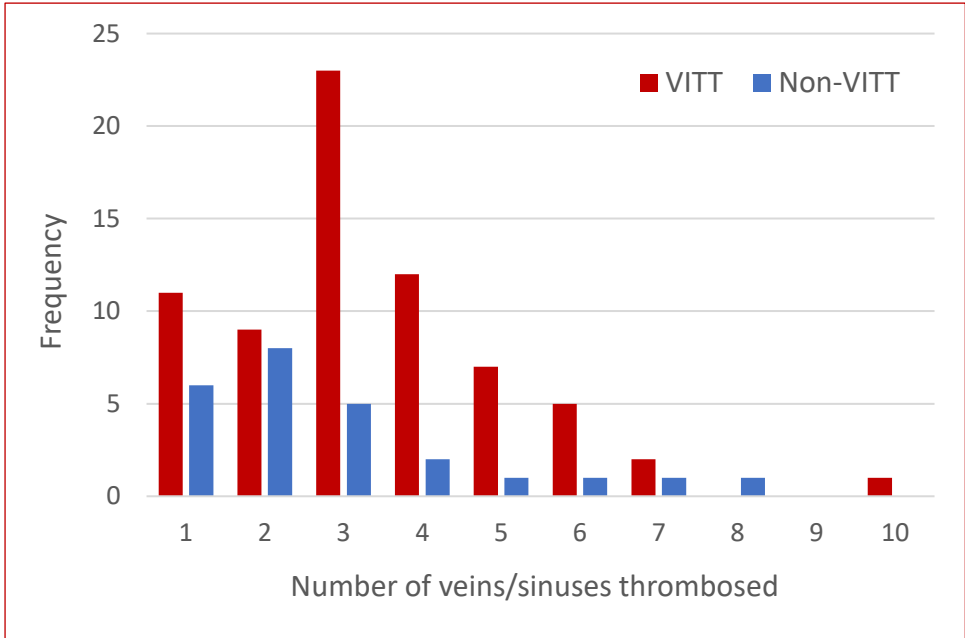

**Figure A5: Number of veins or sinuses thrombosed in the VITT and non-VITT groups**

The median number was higher in the VITT group (3) than in the non-VITT group (2,  $p=0.04$ ).
